# Supplementary material
Source: PubMed Central journal article supplement (PMC1829245)

GFP-lamin A

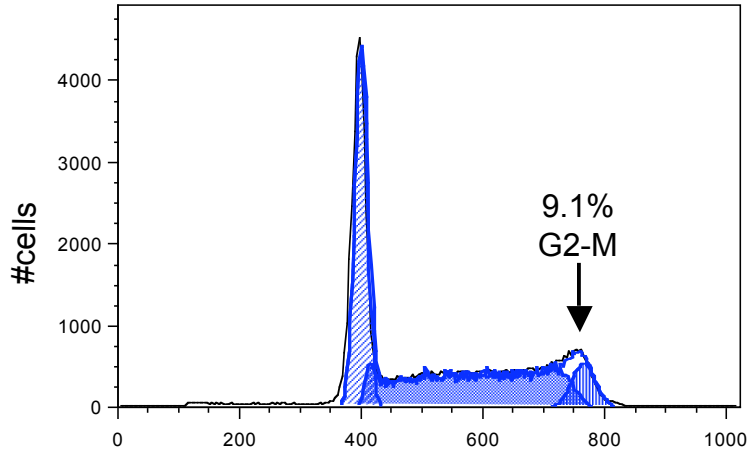

GFP-progerin

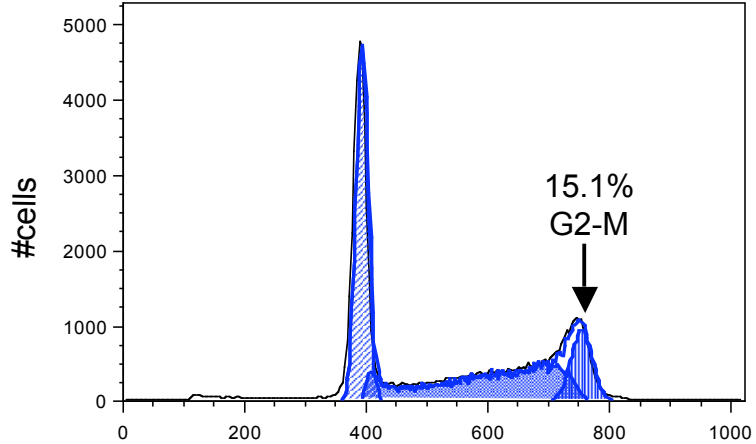

Supplement: pnas_0611640104_1.pdf [file pnas_0611640104_1.pdf]

progerin

lamin A/C

Merge+DNA

Normal

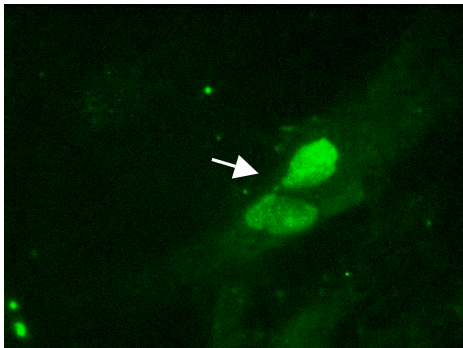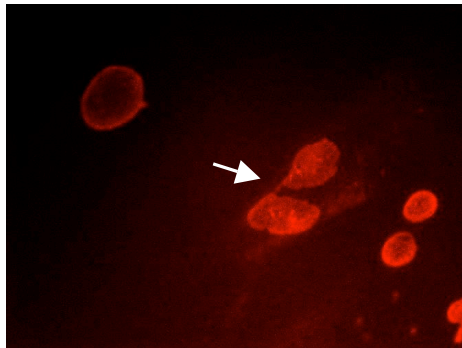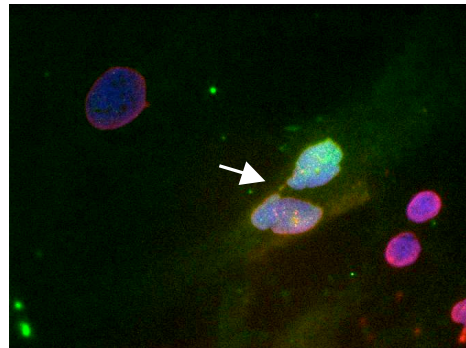

Normal

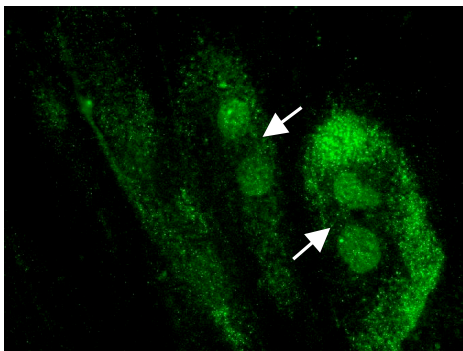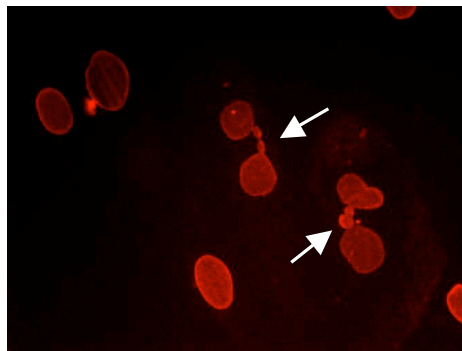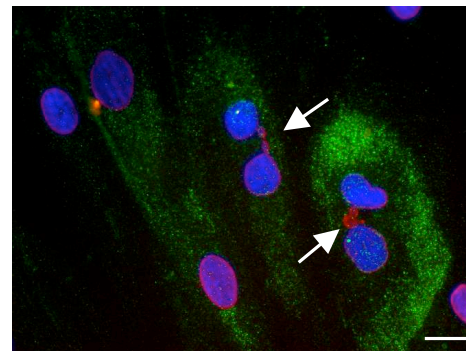

Supplement: pnas_0611640104_2.pdf [file pnas_0611640104_2.pdf]
